# Supplementary material
Source: PubMed Central journal article supplement (PMC3398548)
Supplement: bi3004928_si_001.pdf [file bi3004928_si_001.pdf]

## Supporting Information

# Botulinum Neurotoxins B and E Translocate at Different Rates and Exhibit Divergent Responses to GT1b and Low pH

*Shihu Sun,<sup>†, ‡</sup> William H. Tepp,<sup>§</sup> Eric A. Johnson,<sup>§</sup> Edwin R. Chapman<sup>\*,†, ‡</sup>*

<sup>†</sup>Howard Hughes Medical Institute

<sup>‡</sup>Department of Neuroscience, University of Wisconsin, Madison, 1300 University Ave, SMI 129, Madison, WI 53706, United States

<sup>§</sup>Department of Bacteriology, University of Wisconsin, Madison, 1550 Linden Drive, Madison, WI 53706, United States

### Corresponding Author

\*Phone: (608) 263-1762. Fax: (608) 265-5512. Email: [chapman@wisc.edu](mailto:chapman@wisc.edu).

## Figure S1

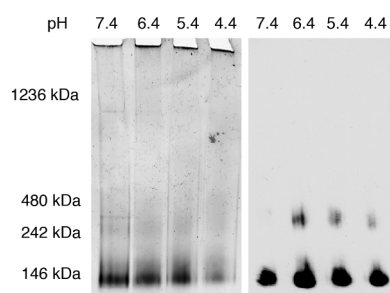

**Figure S1** BN-PAGE followed by silver staining (*left*) or immunoblot analysis (*right*) of BoNT/E at the indicated pH value.
